# Supplementary material
Source: MDPI journal article supplement (https://www.mdpi.com/2304-6740/12/4/99)
Supplement: s1 [file s1]

# Extended Supplementary Information

## On the Structural and Vibrational Properties of Solid Endohedral Metallofullerene Li@C<sub>60</sub>

Martina Vrankić <sup>1,†</sup>, Takeshi Nakagawa <sup>2,†</sup>, Melita Menelaou <sup>3,†</sup>, Yasuhiro Takabayashi <sup>4,†</sup>, Naoya Yoshikane <sup>5</sup>, Keisuke Matsui <sup>6</sup>, Ken Kokubo <sup>7,‡</sup>, Kenichi Kato <sup>8</sup>, Saori Kawaguchi-Imada <sup>9</sup>, Hirokazu Kadobayashi <sup>9</sup>, John Arvanitidis <sup>10</sup>, Yoshiki Kubota <sup>5</sup> and Kosmas Prassides <sup>5,11,\*</sup>

<sup>1</sup> Division of Materials Physics, Ruđer Bošković Institute, 10000 Zagreb, Croatia

<sup>2</sup> Center for High-Pressure Science & Technology Advanced Research, Beijing 100094, China

<sup>3</sup> Department of Mechanical Engineering and Materials Science and Engineering, Cyprus University of Technology, Limassol 3036, Cyprus

<sup>4</sup> Department of Physical Science and Engineering, Nagoya Institute of Technology, Nagoya 466-8555, Japan

<sup>5</sup> Department of Physics, Graduate School of Science, Osaka Metropolitan University, Osaka 599-8531, Japan

<sup>6</sup> Department of Materials Science, Graduate School of Engineering, Osaka Metropolitan University, Osaka 599-8531, Japan

<sup>7</sup> Division of Applied Chemistry, Graduate School of Engineering, Osaka University, Osaka 565-0871, Japan

<sup>8</sup> RIKEN SPring-8 Center, 1-1-1 Kouto, Sayo-gun, Sayo-cho 679-5148, Japan

<sup>9</sup> Japan Synchrotron Radiation Research Institute (JASRI), 1-1-1 Kouto, Sayo-gun, Sayo-cho 679-5198, Japan

<sup>10</sup> Physics Department, Aristotle University of Thessaloniki, 54124 Thessaloniki, Greece

<sup>11</sup> Faculty of Engineering, Kyoto University of Advanced Science, Kameoka 621-8555, Japan

\* Correspondence: k.prassides@omu.ac.jp

† These authors contributed equally to this work.

‡ Present address: Nano Carbon Device Research Center, National Institute of Advanced Industrial Science and Technology (AIST), Tsukuba 305-8565, Japan.

### Equation S1

The Murnaghan equation-of-state (eq. 1) expressed as  $V(P)$  – volume as a function of pressure:

$$V = V_0[1 + P(K_0'/K_0)]^{-1/K_0'} \quad (\text{S1})$$

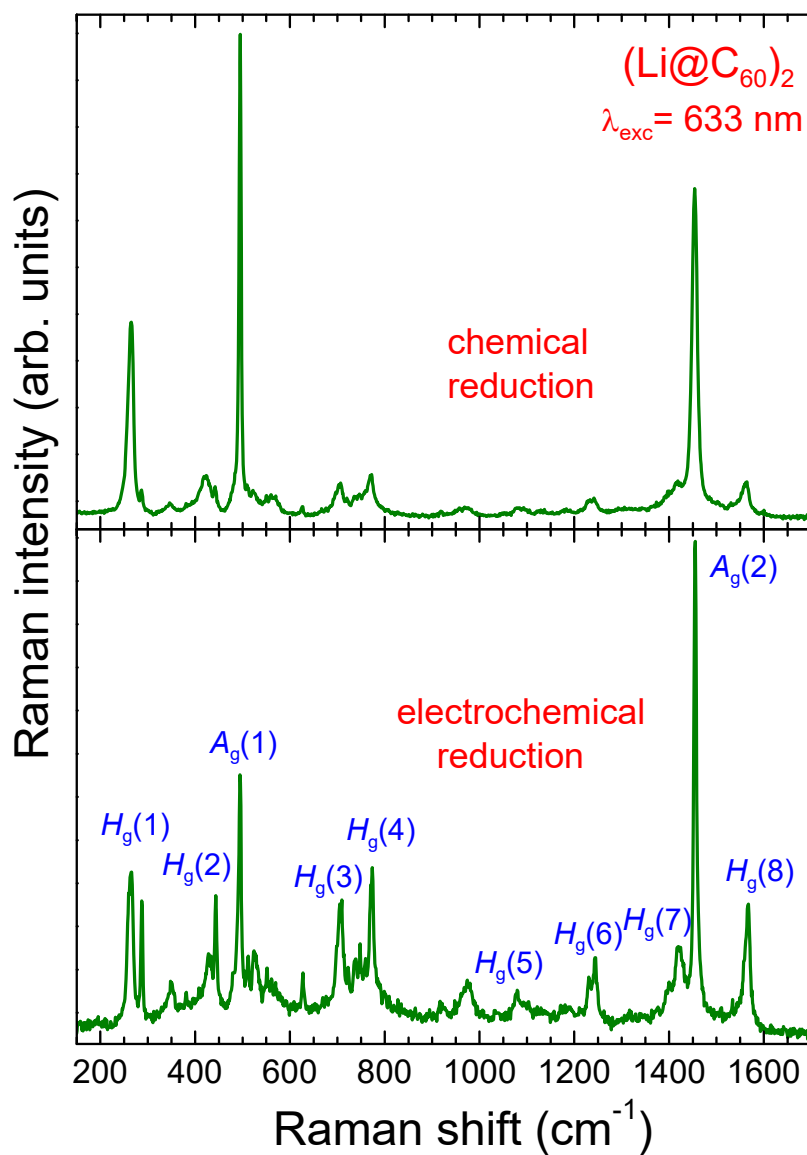

**Figure S1.** The Raman spectrum of  $(\text{Li}@\text{C}_{60})_2$  obtained by electrochemical reduction compared to that obtained by chemical reduction. The mode assignment refers to the irreducible representations of the  $\text{C}_{60}$  molecule in  $I_h$  symmetry.

**Table S1.** Tentative assignment of the observed Raman peaks and their frequencies for monomeric solid C<sub>60</sub> and (Li@C<sub>60</sub>)(PF<sub>6</sub>) and for dimeric solid (C<sub>59</sub>N)<sub>2</sub> and (Li@C<sub>60</sub>)<sub>2</sub>. The A<sub>g</sub>(2) mode is shown in bold.

| Mode <sup>a</sup>   | C <sub>60</sub> | (Li@C <sub>60</sub> )(PF <sub>6</sub> ) | (C <sub>59</sub> N) <sub>2</sub> | (Li@C <sub>60</sub> ) <sub>2</sub> |
|---------------------|-----------------|-----------------------------------------|----------------------------------|------------------------------------|
| H <sub>g</sub> (1)  | 266             | 269                                     | 257                              | 259                                |
|                     | 272             |                                         | 263                              | 263                                |
|                     |                 |                                         | 266                              | 267                                |
|                     |                 |                                         | 269                              |                                    |
|                     |                 |                                         | 286                              | 287                                |
| G <sub>u</sub> (1)  |                 |                                         | 344                              | 338                                |
| G <sub>g</sub> (1)  |                 |                                         | 352                              | 350                                |
|                     |                 |                                         | 375                              | 370                                |
|                     |                 |                                         |                                  | 381                                |
|                     |                 |                                         | 396                              | 397                                |
| H <sub>u</sub> (1)  |                 |                                         | 417                              | 408                                |
|                     |                 |                                         |                                  |                                    |
| H <sub>g</sub> (2)  | 432             | 434                                     | 424                              | 422                                |
|                     |                 |                                         |                                  | 428                                |
|                     |                 |                                         | 432                              | 434                                |
| G <sub>g</sub> (1)  |                 |                                         | 446                              | 444                                |
|                     |                 |                                         | 469                              |                                    |
| H <sub>u</sub> (2)  | 485             | 488                                     |                                  |                                    |
| A <sub>g</sub> (1)  | 496             | 497                                     | 490                              | 494                                |
| F <sub>1g</sub> (1) |                 |                                         | 512                              | 512                                |
| G <sub>g</sub> (2)  |                 |                                         | 522                              | 524                                |
|                     |                 |                                         |                                  | 530                                |
| F <sub>2g</sub> (1) |                 |                                         | 548                              | 552                                |
| F <sub>1u</sub> (2) |                 |                                         |                                  | 561                                |
|                     |                 |                                         |                                  | 569                                |
| F <sub>2u</sub> (2) |                 |                                         |                                  | 579                                |
| G <sub>g</sub> (3)  |                 |                                         | 623                              | 627                                |
| H <sub>u</sub> (4)  |                 |                                         | 669                              |                                    |
|                     |                 |                                         | 682                              |                                    |
|                     |                 |                                         |                                  | 698                                |
| H <sub>g</sub> (3)  | 711             | 714                                     | 704                              | 704                                |
|                     |                 |                                         | 710                              | 709                                |
|                     |                 |                                         | 717                              | 722                                |
|                     |                 |                                         | 730                              |                                    |
|                     |                 |                                         | 735                              | 735                                |

**Table S1.** (continued)

| <b>Mode<sup>a</sup></b> | <b>C<sub>60</sub></b> | <b>(Li@C<sub>60</sub>)(PF<sub>6</sub>)</b> | <b>(C<sub>59</sub>N)<sub>2</sub></b> | <b>(Li@C<sub>60</sub>)<sub>2</sub></b> |
|-------------------------|-----------------------|--------------------------------------------|--------------------------------------|----------------------------------------|
| G <sub>u</sub> (2)      |                       |                                            | 738                                  | 739                                    |
|                         |                       |                                            | 743                                  |                                        |
| H <sub>g</sub> (4)      | 773                   | 774                                        | 754                                  | 748                                    |
|                         |                       |                                            | 761                                  | 758                                    |
|                         |                       |                                            | 768                                  | 769                                    |
|                         |                       |                                            | 773                                  | 774                                    |
| ω(1)                    |                       |                                            |                                      | 922                                    |
| ω(2)                    |                       |                                            |                                      | 973                                    |
| G <sub>u</sub> (4)      |                       |                                            |                                      | 1079                                   |
| H <sub>g</sub> (5)      | 1100                  | 1101                                       | 1091                                 | 1100                                   |
|                         |                       |                                            | 1106                                 |                                        |
| H <sub>g</sub> (6)      | 1251                  | 1246                                       | 1183                                 | 1176                                   |
|                         |                       |                                            | 1190                                 | 1189                                   |
|                         |                       |                                            | 1237                                 | 1231                                   |
|                         |                       |                                            |                                      | 1244                                   |
| H <sub>u</sub> (4)      |                       |                                            |                                      | 1399                                   |
| H <sub>g</sub> (7)      | 1423                  | 1423                                       | 1415                                 | 1421                                   |
|                         |                       |                                            | 1424                                 |                                        |
|                         |                       |                                            | 1439                                 |                                        |
| G <sub>g</sub> (5)      |                       |                                            | 1457                                 |                                        |
|                         | 1458                  |                                            |                                      |                                        |
| <b>A<sub>g</sub>(2)</b> | <b>1468</b>           | <b>1465</b>                                | <b>1462</b>                          | <b>1455</b>                            |
| G <sub>u</sub> (6)      |                       |                                            | 1553                                 |                                        |
| H <sub>g</sub> (8)      | 1573                  | 1573                                       |                                      | 1561                                   |
|                         |                       |                                            | 1566                                 | 1567                                   |
|                         |                       |                                            | 1575                                 |                                        |
| H <sub>u</sub> (7)      |                       |                                            | 1586                                 |                                        |

<sup>a</sup>Mode assignment refers to the irreducible representations of the C<sub>60</sub> molecule in *I<sub>h</sub>* symmetry and is in accordance to that of Ref. [24].

**Table S2.** Refined parameters of the Rietveld analysis (using the Fullprof suite) of the synchrotron X-ray powder diffraction data of  $(\text{Li}@\text{C}_{60})_2$  prepared by electrochemical reduction at 300 K. The space group is  $P6_3/mmc$ . The lattice constants and the unit cell volume are:  $a = 10.0432(3) \text{ \AA}$ ,  $c = 16.135(9) \text{ \AA}$ , and  $V = 1409.5(1) \text{ \AA}^3$ . The  $\text{Li}@\text{C}_{60}$  units were modelled as spherical shells with a radius of  $3.54 \text{ \AA}$  residing at the  $2d$  ( $\frac{2}{3}, \frac{1}{3}, \frac{1}{4}$ ) lattice sites. The  $\text{CH}_2\text{Cl}_2$  solvent molecules were modelled by introducing an isoelectronic Mo atom ( $Z = 42$ ) residing at the  $2a$  (0,0,0) lattice sites. The refined stoichiometry of the material is  $(\text{Li}@\text{C}_{60})_2 \cdot (\text{CH}_2\text{Cl}_2)_{0.81(2)}$ . The weighted-profile and expected  $R$  factors are  $R_{\text{wp}} = 5.79\%$  and  $R_{\text{exp}} = 1.48\%$ , respectively.

|                          | $x/a$         | $y/b$         | $z/c$         | $N$      | $B_{\text{iso}} (\text{\AA}^2)$ |
|--------------------------|---------------|---------------|---------------|----------|---------------------------------|
| $\text{C}_{60}$          | $\frac{2}{3}$ | $\frac{1}{3}$ | $\frac{1}{4}$ | 1        | 11.7(8)                         |
| $\text{CH}_2\text{Cl}_2$ | 0             | 0             | 0             | 0.404(8) | 14(1)                           |
